# Supplementary material for: Plasmon catalytic PATP coupling reaction on Ag-NPs/graphite studied via in situ electrochemical surface-enhanced Raman spectroscopy
Source: Royal Society of Chemistry journal article supplement (doi:10.1039/d0cp01733g), 2020-01-01
Supplement: d0cp01733g1.pdf [file d0cp01733g1.pdf]

### Supplementary Information

Proposed reaction path of PATP coupling into DMAB under O<sub>2</sub>-free condition:

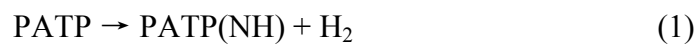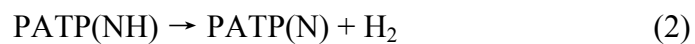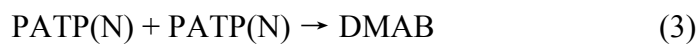

Proposed reaction path of PATP coupling into DMAB under O<sub>2</sub>-rich condition:

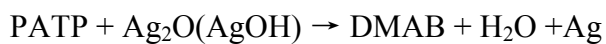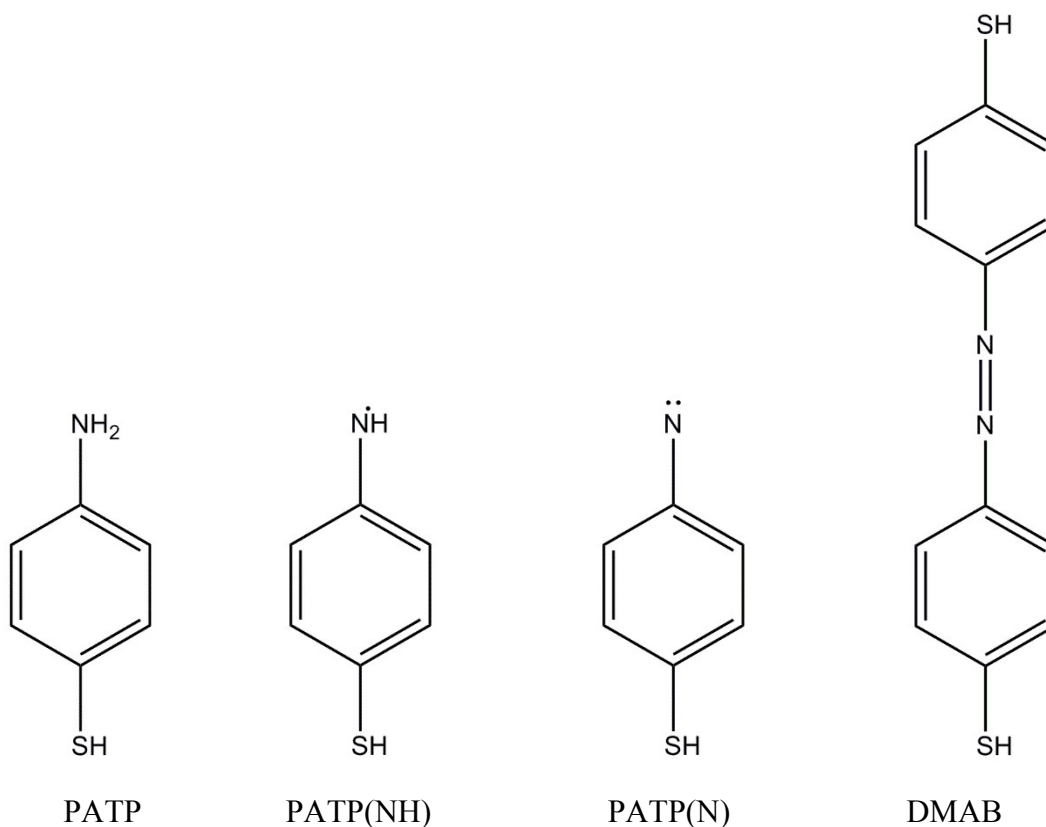

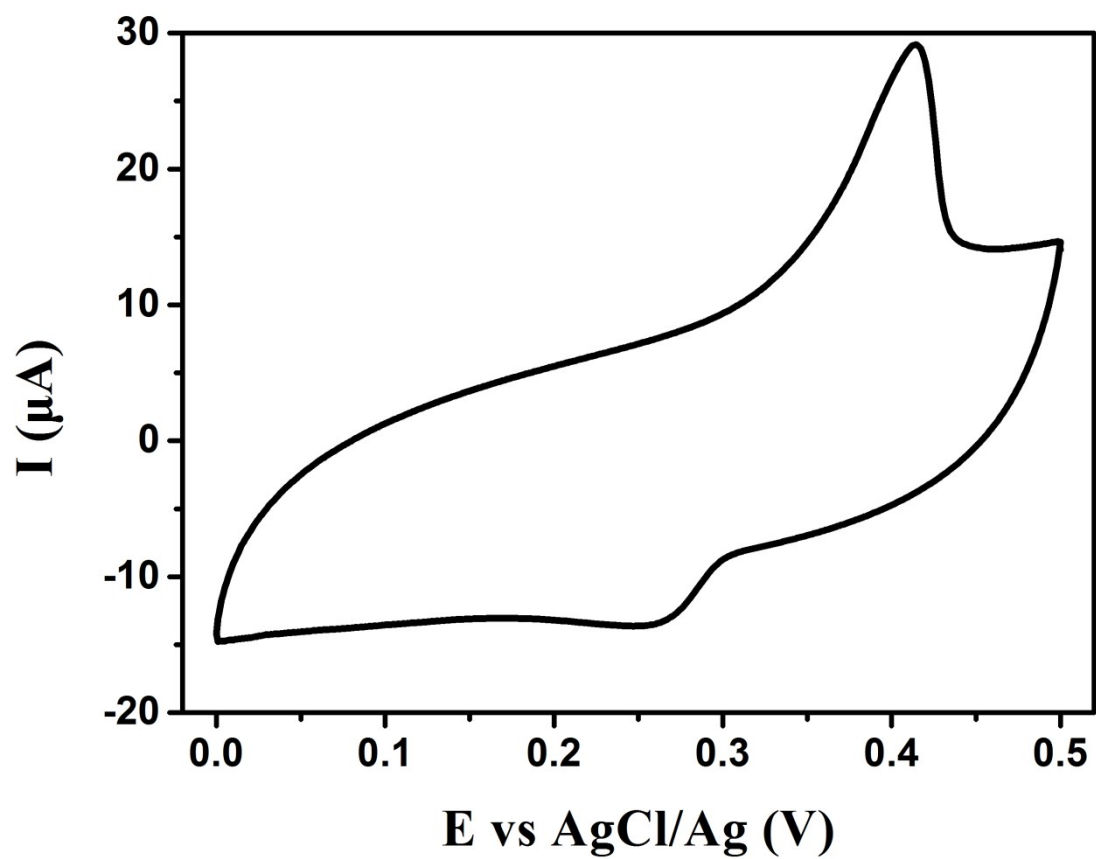

**Fig. S1.** Cyclic voltammogram of the graphite foil in the aqueous electrolyte of 1.0 mM  $\text{KNO}_3$  and 0.1 mM  $\text{AgNO}_3$ . Scan rate:  $10 \text{ mV s}^{-1}$ .

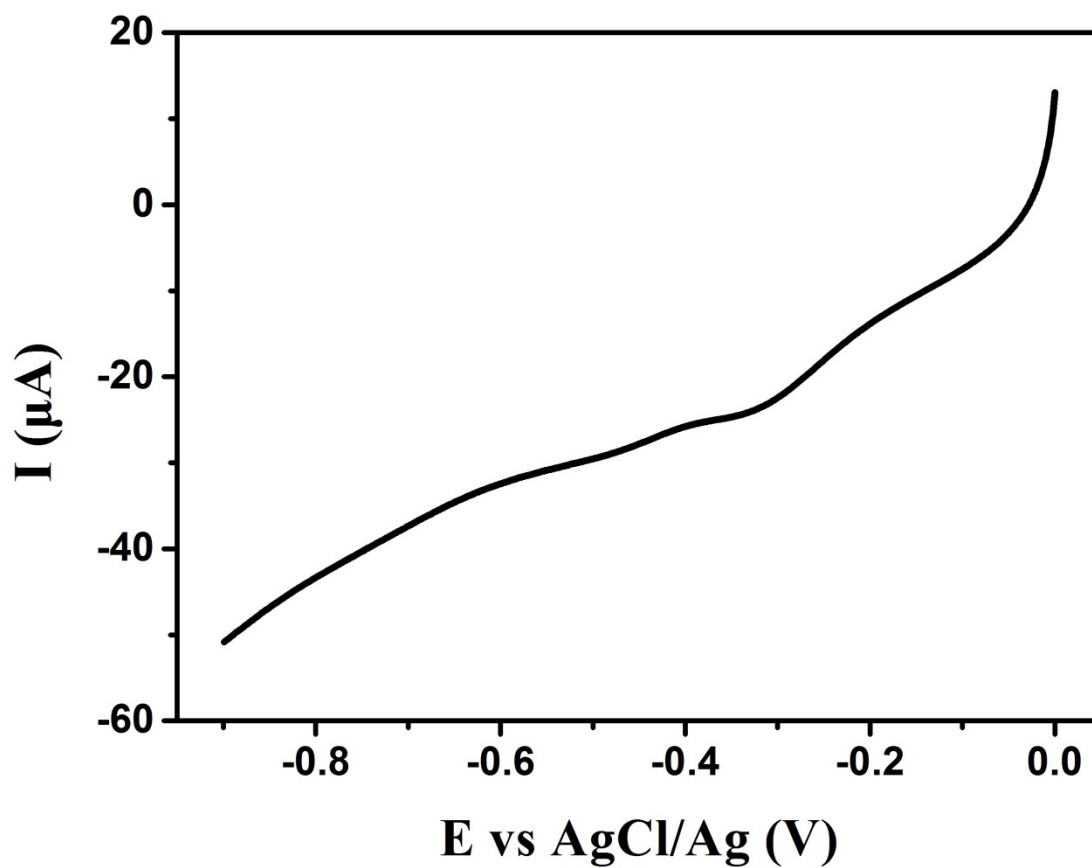

**Fig. S2.** Linear sweep voltammogram of DMAB adsorbed on the Ag-NPs/graphite in the aqueous electrolyte of 1.0 mM KNO<sub>3</sub>. Scan rate: 5 mV s<sup>-1</sup>.

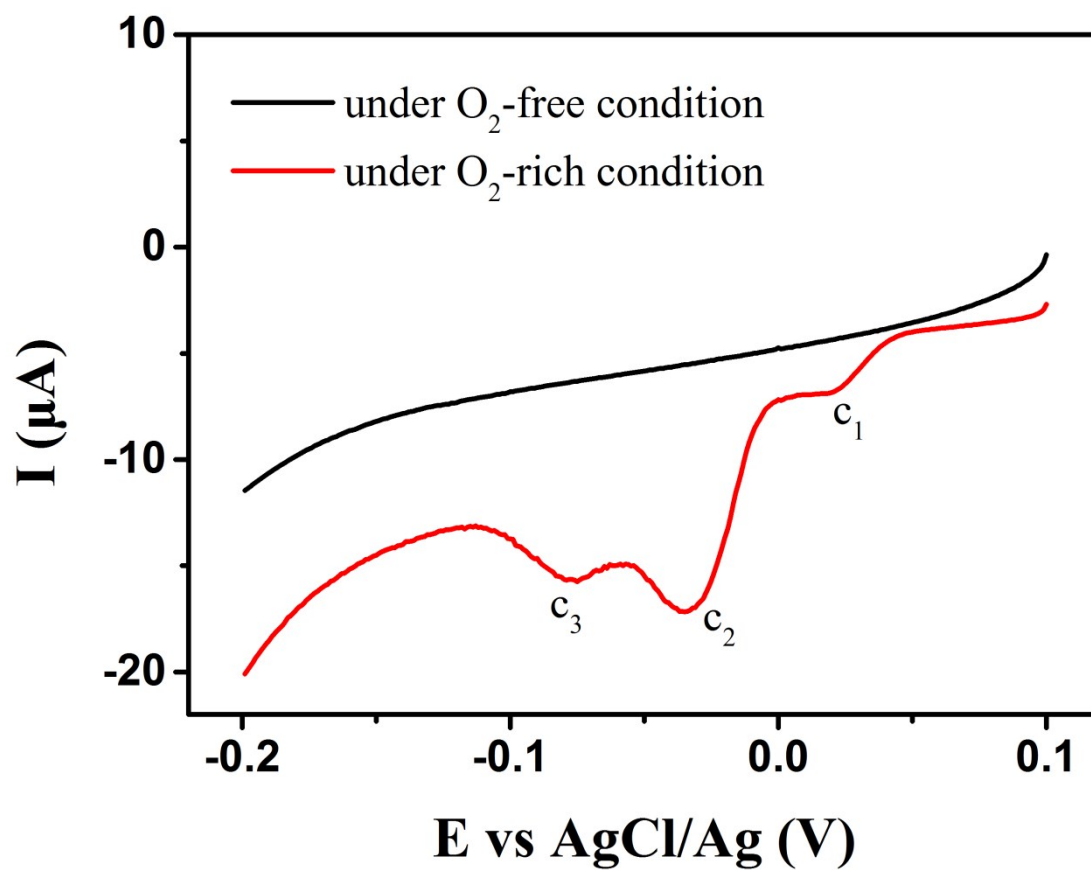

**Fig. S3.** Linear sweep voltammogram of the Ag-NPs/graphite after the laser irradiation under O<sub>2</sub>-free and O<sub>2</sub>-rich conditions in the aqueous electrolyte of 1.0 mM KCl. Scan rate: 10 mV s<sup>-1</sup>.

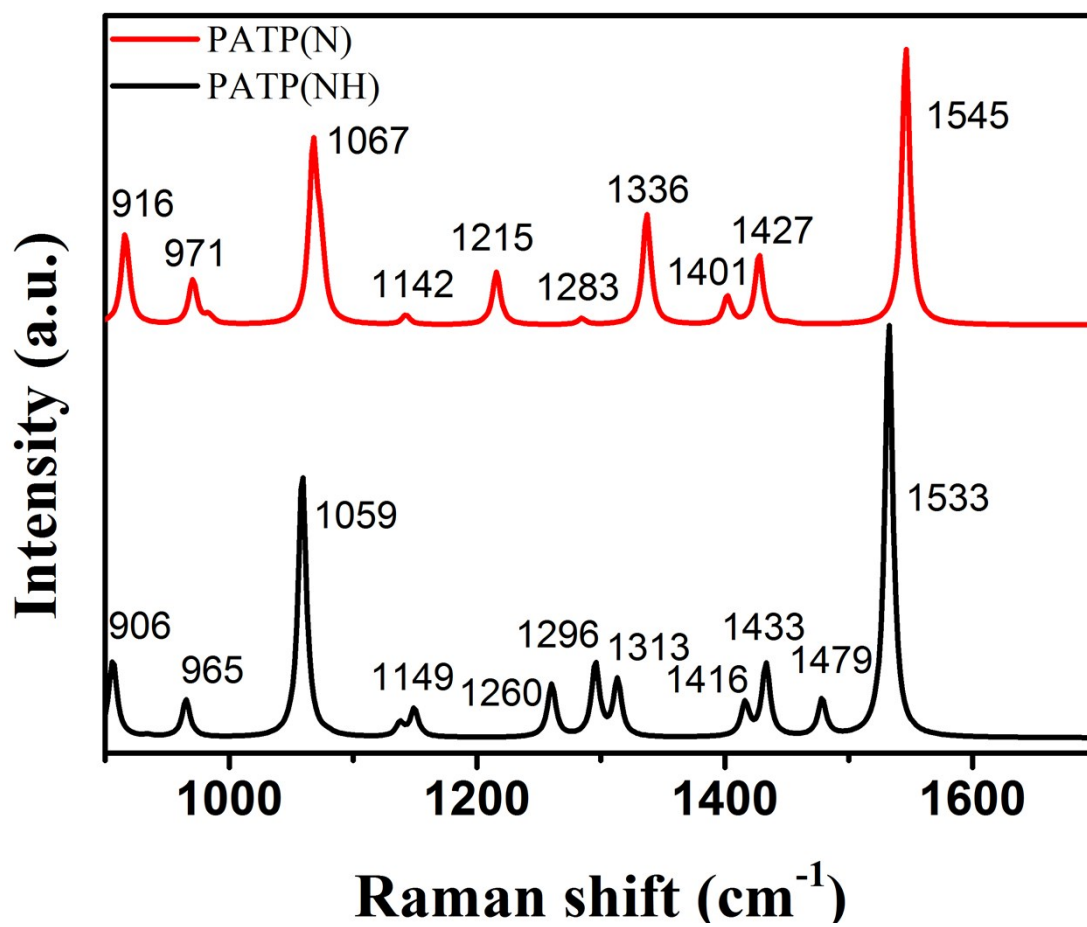

Fig. S4. Calculated Raman spectra of PATP(N) and PATP(NH)

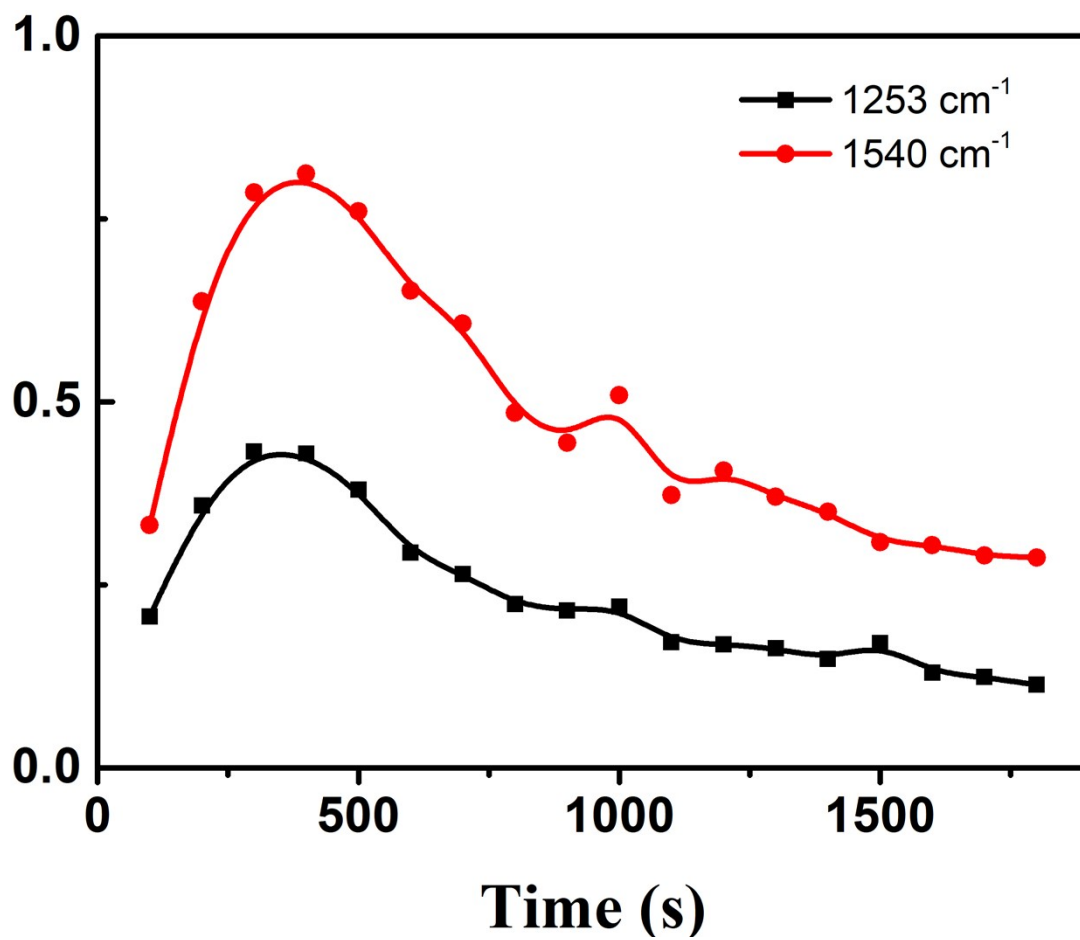

**Fig. S5.** The Raman intensity ratios of the 1253 cm<sup>-1</sup> and 1540 cm<sup>-1</sup> bands with respect to the 1080 cm<sup>-1</sup> band. Analysis is based on the data of figure 3a.

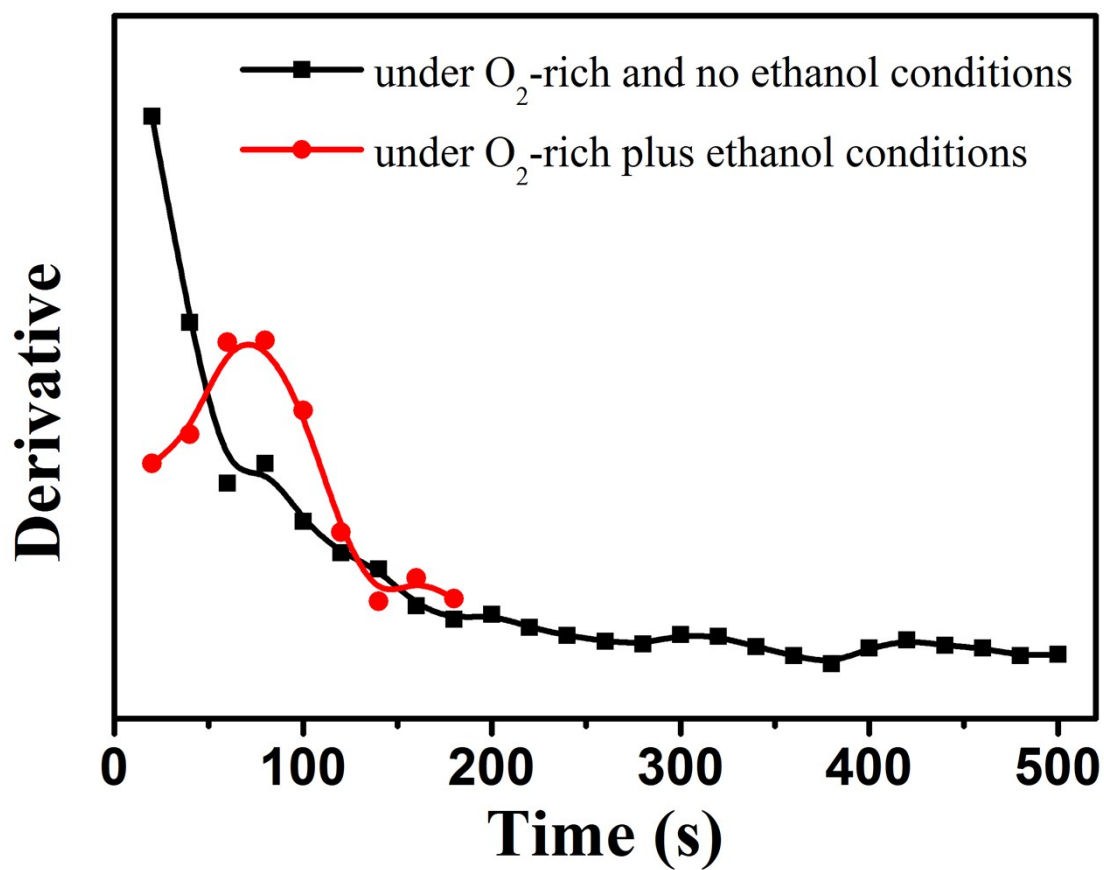

**Fig. S6.** Derivatives of the relative intensity of the 1143 cm<sup>-1</sup> band with respect to the 1080 cm<sup>-1</sup> band under O<sub>2</sub>-rich and no ethanol conditions (black dot and line), and under O<sub>2</sub>-rich plus ethanol conditions (red dot and line).

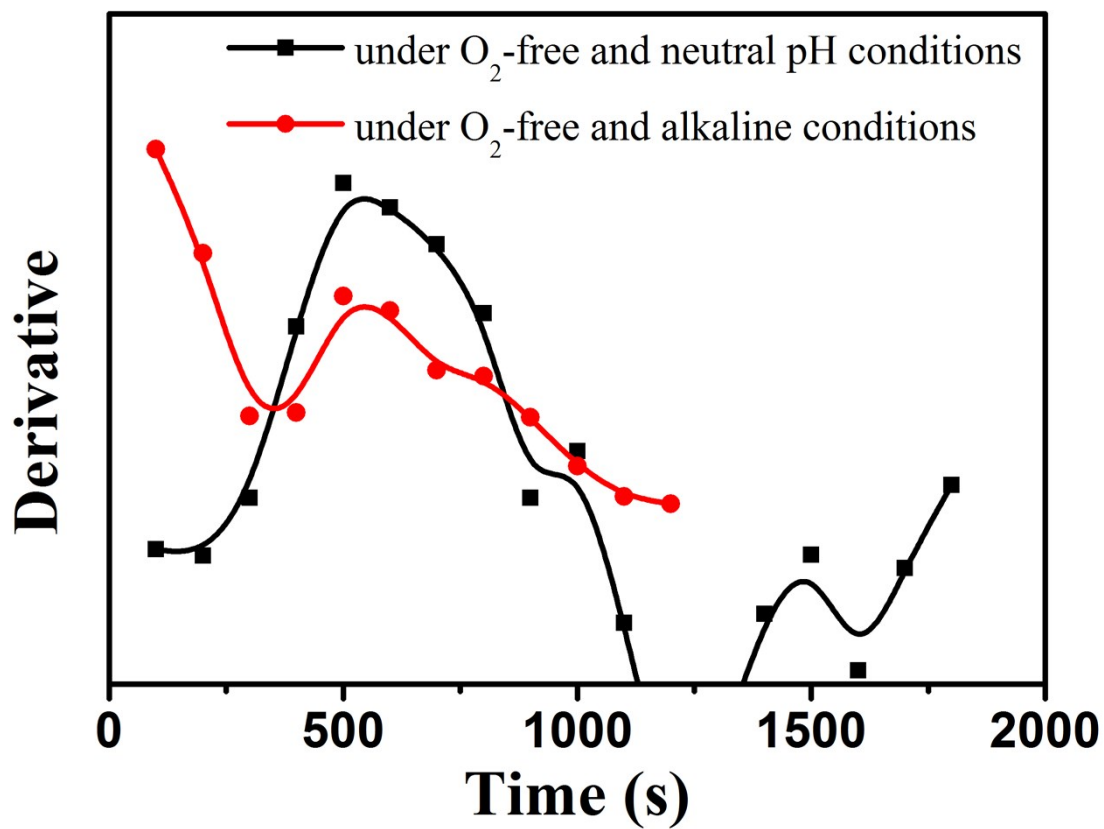

**Fig. S7.** Derivatives of the relative intensity of the 1143  $\text{cm}^{-1}$  band with respect to the 1080  $\text{cm}^{-1}$  band under  $\text{O}_2$ -free and neutral pH conditions (black dot and line), and under  $\text{O}_2$ -free and alkaline (pH 8.0) conditions (red dot and line).



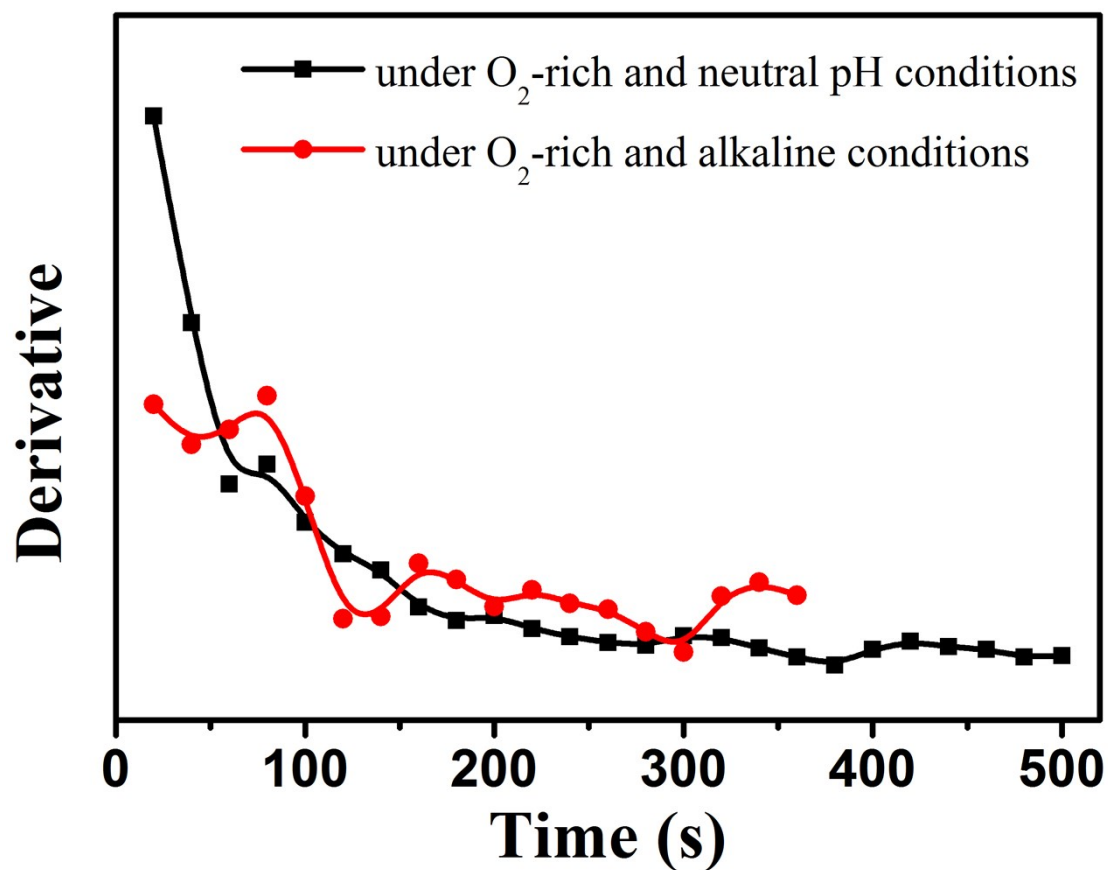

**Fig. S8.** Derivatives of the relative intensity of the 1143  $\text{cm}^{-1}$  band with respect to the 1080  $\text{cm}^{-1}$  band under  $\text{O}_2$ -rich and neutral pH conditions (black dot and line), and under  $\text{O}_2$ -rich and alkaline (pH 8.0) conditions (red dot and line).

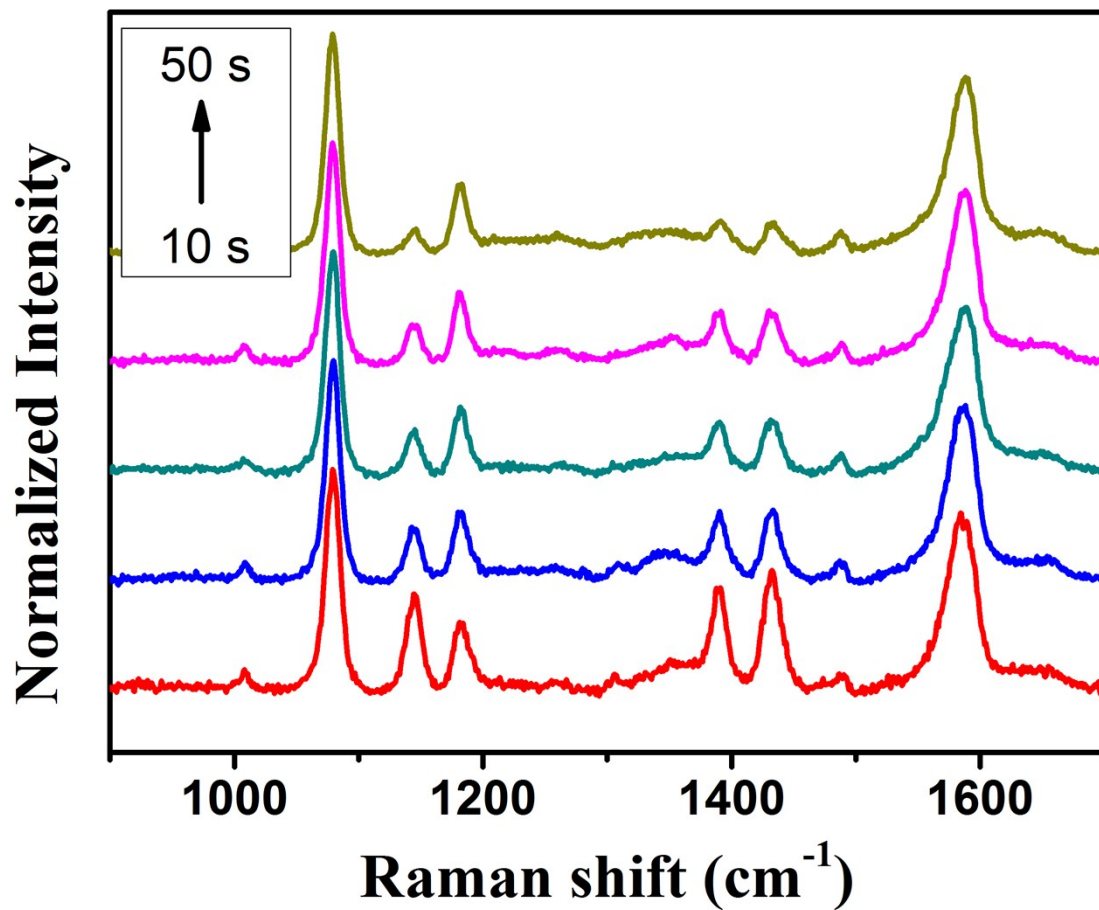

**Fig. S9.** Successive SERS measurements of DMAB adsorbed on the Ag-NPs/graphite under O<sub>2</sub>-free and acidic (pH 3.0) conditions. The integration time of each spectrum was 10s. These spectra are normalized at the 1080 cm<sup>-1</sup> band.

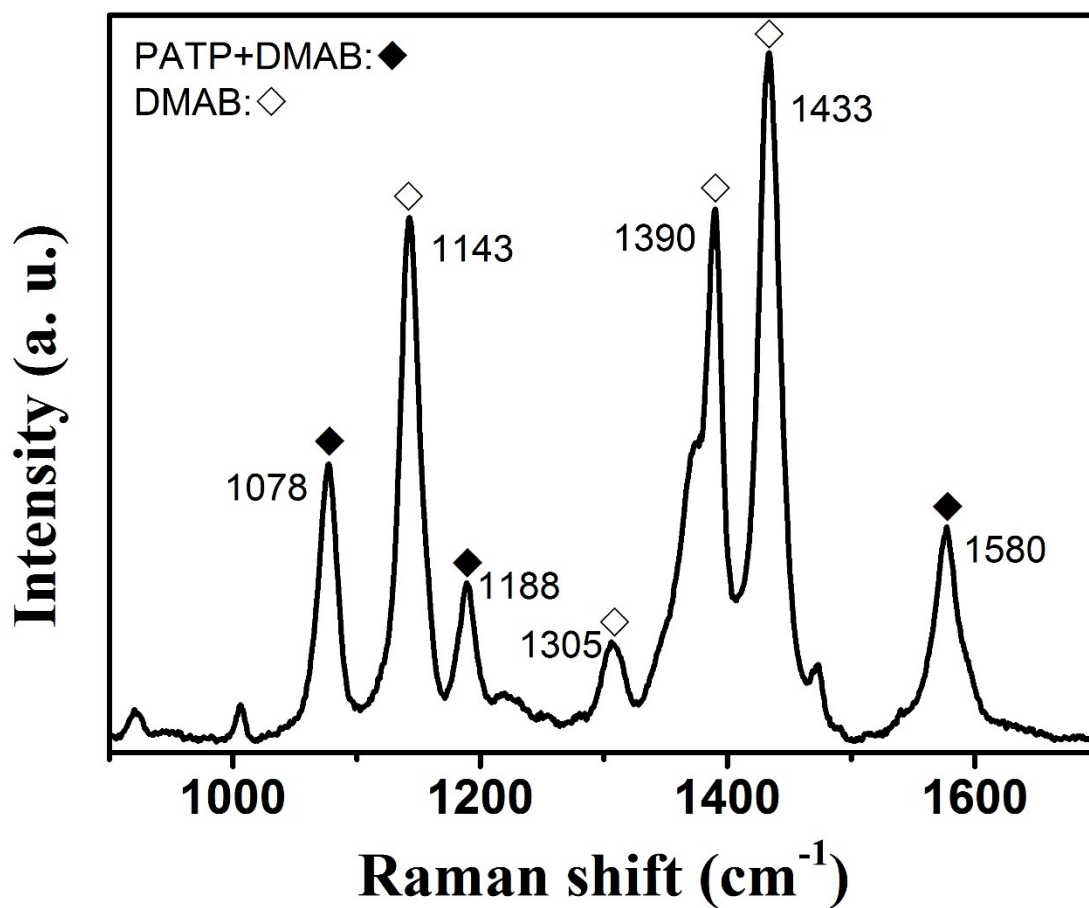

**Fig. S10.** SERS measurement after PATP and ethanol were added under  $\text{O}_2$ -free condition onto Ag-NPs/graphite which was irradiated by the laser for 10 minutes under  $\text{O}_2$ -rich condition. The integration time was 20 s.
